# Supplementary material for: Ablation of a Single N-Glycosylation Site in Human FSTL 1 Induces Cardiomyocyte Proliferation and Cardiac Regeneration
Source: PubMed Central journal article supplement — Mol Ther Nucleic Acids. 2018 Sep 1;13:133–43. doi: 10.1016/j.omtn.2018.08.021 (PMC6171324; doi:10.1016/j.omtn.2018.08.021), 2018-09-01
Supplement: mmc1.pdf [file mmc1.pdf]

**OMTN, Volume 13**

## **Supplemental Information**

### **Ablation of a Single N-Glycosylation Site in Human FSTL 1 Induces Cardiomyocyte Proliferation and Cardiac Regeneration**

**Ajit Magadum, Neha Singh, Ann Anu Kurian, Mohammad Tofael Kabir Sharkar, Elena Chepurko, and Lior Zangi**

## **Supplemental Information**

### **Table of Contents**

- 1) Supplemental Figures
- 2) Supplemental Tables

**Figure S1. modRNA open reading frame and translated amino-acid sequences used for this study.** The start codon (green) stop codon (red) and wild-type and mutated glycosylation sites (yellow) are indicated on the DNA sequence.

### **Luciferase (modRNA control)**

**ATG**GCCGATGCTAAGAACATTAAGAAGGGCCCTGCTCCCTTCTACCCTCTGG  
AGGATGGCACCGCTGGCGAGCAGCTGCACAAGGCCATGAAGAGGTATGCCC  
TGGTGCCTGGCACCATTCCTTACCGATGCCACATTGAGGTGGACATCACC  
TATGCCGAGTACTTCGAGATGTCTGTGCGCCTGGCCGAGGCCATGAAGAGGT  
ACGGCCTGAACACCAACCACCGCATCGTGGTGTGCTCTGAGAACTCTCTGCA  
GTTCTTCATGCCAGTGCTGGGCGCCCTGTTTCATCGGAGTGGCCGTGGCCCCTG  
CTAACGACATTTACAACGAGCGCGAGCTGCTGAACAGCATGGGCATTTCTCA  
GCCTACCGTGGTGTTCGTGTCTAAGAAGGGCCCTGCAGAAGATCCTGAACGTG  
CAGAAGAAGCTGCCTATCATCCAGAAGATCATCATCATGGACTCTAAGACCG  
ACTACCAGGGCTTCCAGAGCATGTACACATTCGTGACATCTCATCTGCCTCCT  
GGCTTCAACGAGTACGACTTCGTGCCAGAGTCTTTCGACAGGGACAAAACCA  
TTGCCCTGATCATGAACAGCTCTGGGTCTACCGGCCTGCCTAAGGGCGTGCC  
CCTGCCTCATCGCACCGCCTGTGTGCGCTTCTCTCACGCCCGCGACCCTATTT

TCGGCAACCAGATCATCCCCGACACCGCTATTCTGAGCGTGGTGCCATTCCAC  
CACGGCTTCGGCATGTTACACCACCTGGGCTACCTGATTTGCGGCTTTCGGGT  
GGTGCTGATGTACCGCTTCGAGGAGGAGCTGTTCTGCGCAGCCTGCAAGAC  
TACAAAATTCAGTCTGCCCTGCTGGTGCCAACCCTGTTTCAGCTTCTTCGCTAA  
GAGCACCTGATCGACAAGTACGACCTGTCTAACCTGCACGAGATTGCCTCT  
GGCGGCGCCCCACTGTCTAAGGAGGTGGGCGAAGCCGTGGCCAAGCGCTTTC  
ATCTGCCAGGCATCCGCCAGGGCTACGGCCTGACCGAGACAACCAGCGCCAT  
TCTGATTACCCAGAGGGCGACGACAAGCCTGGCGCCGTGGGCAAGGTGGTG  
CCATTCTTCGAGGCCAAGGTGGTGGACCTGGACACCGGCAAGACCCTGGGAG  
TGAACCAGCGCGGCGAGCTGTGTGTGCGCGGCCCTATGATTATGTCCGGCTA  
CGTGAATAACCCTGAGGCCACAAACGCCCTGATCGACAAGGACGGCTGGCTG  
CACTCTGGCGACATTGCCTACTGGGACGAGGACGAGCACTTCTTCATCGTGG  
ACCGCCTGAAGTCTCTGATCAAGTACAAGGGCTACCAGGTGGCCCCAGCCGA  
GCTGGAGTCTATCCTGCTGCAGCACCTAACATTTTCGACGCCGGAGTGGCC  
GGCCTGCCCGACGACGATGCCGGCGAGCTGCCTGCCGCCGTCGTCGTGCTGG  
AACACGGCAAGACCATGACCGAGAAGGAGATCGTGGACTATGTGGCCAGCC  
AGGTGACAACCGCCAAGAAGCTGCGCGGCGGAGTGGTGTTCGTGGACGAGG  
TGCCCAAGGGCCTGACCGGCAAGCTGGACGCCCGCAAGATCCGCGAGATCCT  
GATCAAGGCTAAGAAAGGCGGCAAGATCGCCGTG**TAA**

Met A D A K N I K K G P A P F Y P L E D G T A G E Q L H K A M K R Y A L V P G  
T I A F T D A H I E V D I T Y A E Y F E M S V R L A E A M K R Y G L N T N H R I  
V V C S E N S L Q F F M P V L G A L F I G V A V A P A N D I Y N E R E L L N S M

GISQPTVVVFSKKGLQKILNVQKKLPPIQKIIIMDSKTDYQ  
GFQSMYTFVTSHLPPGFNEYDFVPESFDRDKTIALIMNSS  
GSTGLPKGVALPHRTACVRFSHARDPIFGNQIIPDTAILS  
VVFHHGFGMFTTLGYLICGFRVVLMYRFEEELFLRSLQDY  
KIQSALLVPTLFSFFAKSTLIDKYDLNLHEIASGGAPLSKE  
VGEAVAKRFHLPGIRQGYGLTETTSAILITPEGDDKPGAV  
GKVVPFFEAKVVDLDTGKTLGVNQRGELCVRGPMIMSG  
YVNNPEATNALIDKDGWLHSGDIAYWDEDEHFFIVDRLKS  
LIKYKGYQVAPAELESILLQHPNIFDAGVAGLPDDDAGEL  
PAAVVVLEHGKTMTEKEIVDYVASQVTTAKKLRGGVVV  
DEVPKGLTGKLDARKIREILIKAKKGGKIAV

### **Human Fstl1**

**ATG**TGGAAACGCTGGCTCGCGCTCGCGCTCGCGCTGGTGGCGGTCGCCTGGG  
TCCGCGCCGAGGAAGAGCTAAGGAGCAAATCCAAGATCTGTGCCAATGTGTT  
TTGTGGAGCCGGCCGGAATGTGCAGTCACAGAGAAAGGGGAACCCACCTGT  
CTCTGCATTGAGCAATGCAAACCTCACAAGAGGCCTGTGTGTGGCAGTAATG  
GCAAGACCTACCTCAACCACTGTGAACTGCATCGAGATGCCTGCCTCACTGG  
ATCCAAAATCCAGGTTGATTACGATGGACACTGCAAAGAGAAGAAATCCGTA  
AGTCCATCTGCCAGCCCAGTTGTTTGCTATCAGTCCAACCGTGATGAGCTCCG  
ACGTCGCATCATCCAGTGGCTGGAAGCTGAGATCATTCCAGATGGCTGGTTCT  
CTAAAGGCAGC**AACT**TACAGTGAAATCCTAGACAAGTATTTTAAGAACTTTGA

TAATGGTGATTCTCGCCTGGACTCCAGTGAATTCCTGAAGTTTGTGGAACAGA  
ATGAAACTGCCATCAATATTACAACGTATCCAGACCAGGAGAACAACAAGTT  
GCTTAGGGGACTCTGTGTTGATGCTCTCATTGAACTGTCTGATGAAAATGCTG  
ATTGGAAACTCAGCTTCCAAGAGTTTCTCAAGTGCCTCAACCCATCTTTCAAC  
CCTCCTGAGAAGAAGTGTGCCCTGGAGGATGAAACGTATGCAGATGGAGCTG  
AGACCGAGGTGGACTGTAACCGCTGTGTCTGTGCCTGTGGAAATTGGGTCTG  
TACAGCCATGACCTGTGACGGAAAGAATCAGAAGGGGGCCAGACCCAGAC  
AGAGGAGGAGATGACCAGATATGTCCAGGAGCTCCAAAAGCATCAGGAAAC  
AGCTGAAAAGACCAAGAGAGTGAGCACCAAAGAGATCTAA

Met WKRWLALALALVAVAVWR AEEELRSKSKICANVFCG  
AGRECAVTEKGEPTCLCIEQCKPHKR P VCGSNGKTYLNH  
CELHRDA CLTGSKIQVDYDGHCKEKKSVSPSASPVV CYQ  
SNRDELRRRIIQWLEAEIIPDGWFSKGS NYSEILDKYFKNF  
DNGDSRLDSSEFLKFVEQ NETAIN ITTYPDQENKLLRGL  
CVDALIELSDENADWKLSFQEFLKCLNPSFNPPEKKCALE  
DETYADGAETEVD CNRCV CACGNWVCTA Met TCDGKNQK  
GAQTQTEEM Met TRYVQELQKHQETA EKTKRVSTKEI

**Mutant 1** (Human Fstl1 N180Q)

ATGTGGAAACGCTGGCTCGCGCTCGCGCTCGCGCTGGTGGCGGTTCGCCTGGG  
TCCGCGCCGAGGAAGAGCTAAGGAGCAAATCCAAGATCTGTGCCAATGTGTT  
TTGTGGAGCCGGCCGGGAATGTGCAGTCACAGAGAAAGGGGAACCCACCTGT

CTCTGCATTGAGCAATGCAAACCTCACAAAGAGGCCTGTGTGTGGCAGTAATG  
GCAAGACCTACCTCAACCACTGTGAACTGCATCGAGATGCCTGCCTCACTGG  
ATCCAAAATCCAGGTTGATTACGATGGACACTGCAAAGAGAAGAAATCCGTA  
AGTCCATCTGCCAGCCCAGTTGTTTGCTATCAGTCCAACCGTGATGAGCTCCG  
ACGTCGCATCATCCAGTGGCTGGAAGCTGAGATCATTCCAGATGGCTGGTTCT  
CTAAAGGCAGCAACTACAGTGAAATCCTAGACAAGTATTTTAAGAACTTTGA  
TAATGGTGATTCTCGCCTGGACTCCAGTGAATTCCTGAAGTTTGTGGAACAGA  
ATGAAACTGCCATC**CAG**ATTACAACGTATCCAGACCAGGAGAACAACAAGTT  
GCTTAGGGGACTCTGTGTTGATGCTCTCATTGAACTGTCTGATGAAAATGCTG  
ATTGGAAACTCAGCTTCCAAGAGTTTCTCAAGTGCCTCAACCCATCTTTCAAC  
CCTCCTGAGAAGAAGTGTGCCCTGGAGGATGAAACGTATGCAGATGGAGCTG  
AGACCGAGGTGGACTGTAACCGCTGTGTCTGTGCCTGTGGAAATTGGGTCTG  
TACAGCCATGACCTGTGACGGAAAGAATCAGAAGGGGGCCAGACCCAGAC  
AGAGGAGGAGATGACCAGATATGTCCAGGAGCTCCAAAAGCATCAGGAAAC  
AGCTGAAAAGACCAAGAGAGTGAGCACCAAAGAGATC**TAA**

Met WKRWLALALALVAVAVWR AEEELRSKSKICANVFCG  
AGRECAVTEKGEPTCLCIEQCKPHKR PVC GSNGKTYLNH  
CELHRDA CLTGSKIQVDYDGHCKEKKS VSPSASPVCYQ  
SNRDELRRRIIQWLEAEIIPDGWFSKGS**N**YSEILDKYFKNF  
DNGDSRLDSSEFLKFVEQ**N**ETAI**Q**ITTYPDQENNKLLRGL  
CVDALIELSDENADWKLSFQEFLKCLNPSFNPPEKKCALE

DETYADGAETEVD CNRCVCACGNWVCTA Met TCDGKNQK  
GAQTQTEEMet TRYVQELQKHQETA EKTKRVSTKEI

**Mutant 2** (Human Fstl1 N175Q)

ATG TGGAAACGCTGGCTCGCGCTCGCGCTCGCGCTGGTGGCGGTCGCCTGGG  
TCCGCGCCGAGGAAGAGCTAAGGAGCAAATCCAAGATCTGTGCCAATGTGTT  
TTGTGGAGCCGGCCGGGAATGTGCAGTCACAGAGAAAGGGGAACCCACCTGT  
CTCTGCATTGAGCAATGCAAACCTCACAAGAGGCCTGTGTGTGGCAGTAATG  
GCAAGACCTACCTCAACCACTGTGAACTGCATCGAGATGCCTGCCTCACTGG  
ATCCAAAATCCAGGTTGATTACGATGGACACTGCAAAGAGAAGAAATCCGTA  
AGTCCATCTGCCAGCCCAGTTGTTTGCTATCAGTCCAACCGTGATGAGCTCCG  
ACGTCGCATCATCCAGTGGCTGGAAGCTGAGATCATTCCAGATGGCTGGTTCT  
CTAAAGGCAGCAACTACAGTGAAATCCTAGACAAGTATTTTAAGAACTTTGA  
TAATGGTGATTCTCGCCTGGACTCCAGTGAATTCCTGAAGTTTGTGGAACAGC  
AGGAAACTGCCATCAATATTACAACGTATCCAGACCAGGAGAACAACAAGTT  
GCTTAGGGGACTCTGTGTTGATGCTCTCATTGAACTGTCTGATGAAAATGCTG  
ATTGGAAACTCAGCTTCCAAGAGTTTCTCAAGTGCCTCAACCCATCTTTCAAC  
CCTCCTGAGAAGAAGTGTGCCCTGGAGGATGAAACGTATGCAGATGGAGCTG  
AGACCGAGGTGGACTGTAACCGCTGTGTCTGTGCCTGTGGAAATTGGGTCTG  
TACAGCCATGACCTGTGACGGAAAGAATCAGAAGGGGGCCAGACCCAGAC  
AGAGGAGGAGATGACCAGATATGTCCAGGAGCTCCAAAAGCATCAGGAAAC  
AGCTGAAAAGACCAAGAGAGTGAGCACCAAAGAGATCTAA

Met WKRWLALALALVAVAVVRAEEELRSKSKICANVFCG  
AGRECAVTEKGEPTCLCIEQCKPHKRPVCGSNGKTYLNH  
CELHRDACTGSKIQVDYDGHCKEKKSVSPSASPVV CYQ  
SNRDELRRRIIQWLEAEIIPDGWFSKGSN YSEILDKYFKNF  
DNGDSRLDSSEFLKFVEQ QETA IN ITTYPDQENKLLRGL  
CVDALIELSDENADWKLSFQEFLKCLNPSFNPPEKKCALE  
DETYADGAETEVD CNRCVCACGNWVCTA Met TCDGKNQK  
GAQTQTEEMet TRYVQELQKHQETA EKTKRVSTKEI

**Mutant 3** (Human Fstl1 N144Q)

ATG TGGAACGCTGGCTCGCGCTCGCGCTCGCGCTGGTGGCGGTGCGCTGGG  
TCCGCGCCGAGGAAGAGCTAAGGAGCAAATCCAAGATCTGTGCCAATGTGTT  
TTGTGGAGCCGGCCGGAATGTGCAGTCACAGAGAAAGGGGAACCCACCTGT  
CTCTGCATTGAGCAATGCAAACCTCACAAGAGGCCTGTGTGTGGCAGTAATG  
GCAAGACCTACCTCAACCACTGTGAACTGCATCGAGATGCCTGCCTCACTGG  
ATCCAAAATCCAGGTTGATTACGATGGACACTGCAAAGAGAAGAAATCCGTA  
AGTCCATCTGCCAGCCCAGTTGTTTGCTATCAGTCCAACCGTGATGAGCTCCG  
ACGTCGCATCATCCAGTGGCTGGAAGCTGAGATCATTCCAGATGGCTGGTTCT  
CTAAAGGCAGCCAGTACAGTGAAATCCTAGACAAGTATTTTAAGAACTTTGA  
TAATGGTGATTCTCGCCTGGACTCCAGTGAATTCCTGAAGTTTGTGGAACAGA  
ATGAAACTGCCATCAATATTACAACGTATCCAGACCAGGAGAACAAACAAGTT  
GCTTAGGGGACTCTGTGTTGATGCTCTCATTGAACTGTCTGATGAAAATGCTG



ATTGGAAACTCAGCTTCCAAGAGTTTCTCAAGTGCCTCAACCCATCTTTCAAC  
CCTCCTGAGAAGAAGTGTGCCCTGGAGGATGAAACGTATGCAGATGGAGCTG  
AGACCGAGGTGGACTGTAACCGCTGTGTCTGTGCCTGTGGAAATTGGGTCTG  
TACAGCCATGACCTGTGACGGAAAGAATCAGAAGGGGGCCAGACCCAGAC  
AGAGGAGGAGATGACCAGATATGTCCAGGAGCTCCAAAAGCATCAGGAAAC  
AGCTGAAAAGACCAAGAGAGTGAGCACCAAAGAGATCTAA

Met WKRWLALALALVAVAVWR AEEELRSKSKICANVFCG  
AGRECAVTEKGEPTCLCIEQCKPHKR P VCGSNGKTYLNH  
CELHRDA CLTGSKIQVDYDGHCKEKKS VSPSASPVV CYQ  
SNRDELRRRIIQWLEAEIIPDGWFSKGS QYSEILDKYFKNF  
DNGDSRLDSSEFLKFVEQ NETA I NITTYPDQENKLLRGL  
CVDALIELSDENADWKLSFQEFLKCLNPSFNPPEKKCALE  
DETYADGAETEVD CNRCVCACGNWVCTA Met TCDGKNQK  
GAQTQTEEMet TRYVQELQKHQETA EKTKRVSTKEI

**Mutant (1-3)** (Human Fstl1 N180Q, N175Q, N144Q)

ATGTGGAAACGCTGGCTCGCGCTCGCGCTCGCGCTGGTGGCGGTTCGCCTGGG  
TCCGCGCCGAGGAAGAGCTAAGGAGCAAATCCAAGATCTGTGCCAATGTGTT  
TTGTGGAGCCGGCCGGGAATGTGCAGTCACAGAGAAAGGGGAACCCACCTGT  
CTCTGCATTGAGCAATGCAAACCTCACAAGAGGCCTGTGTGTGGCAGTAATG  
GCAAGACCTACCTCAACCACTGTGAACTGCATCGAGATGCCTGCCTCACTGG  
ATCCAAAATCCAGGTTGATTACGATGGACACTGCAAAGAGAAGAAATCCGTA

AGTCCATCTGCCAGCCCAGTTGTTTGCTATCAGTCCAACCGTGATGAGCTCCG  
ACGTCGCATCATCCAGTGGCTGGAAGCTGAGATCATTCCAGATGGCTGGTTCT  
CTAAAGGCAGCCAGTACAGTGAAATCCTAGACAAGTATTTTAAGAACTTTGA  
TAATGGTGATTCTCGCCTGGACTCCAGTGAATTCCTGAAGTTTGTGGAACAGC  
AGGAAACTGCCATCCAGATTACAACGTATCCAGACCAGGAGAACAACAAGTT  
GCTTAGGGGACTCTGTGTTGATGCTCTCATTGAACTGTCTGATGAAAATGCTG  
ATTGGAAACTCAGCTTCCAAGAGTTTCTCAAGTGCCTCAACCCATCTTTCAAC  
CCTCCTGAGAAGAAGTGTGCCCTGGAGGATGAAACGTATGCAGATGGAGCTG  
AGACCGAGGTGGACTGTAACCGCTGTGTCTGTGCCTGTGGAAATTGGGTCTG  
TACAGCCATGACCTGTGACGGAAAGAATCAGAAGGGGGCCAGACCCAGAC  
AGAGGAGGAGATGACCAGATATGTCCAGGAGCTCCAAAAGCATCAGGAAAC  
AGCTGAAAAGACCAAGAGAGTGAGCACCAAAGAGATCTAA

Met WKRWLALALALVAVAVWR AEEELRSKSKICANVFCG  
AGRECAVTEKGEPTCLCIEQCKPHKR P VCGSNGKTYLNH  
CELHRDA CLTGSKIQVDYDGHCKEKKS VSPSASP VVCYQ  
SNRDELRRRIIQWLEAEIIPDGWFSKGS QYSEILDKYFKNF  
DNGDSRLDSSEFLKFVEQ QETAI QITTYPDQENNKLLRGL  
CVDALIELSDENADWKLSFQEFLKCLNPSFNPPEKKCALE  
DETYADGAETE VDCNRCVCACGNWVCTA Met TCDGKNQK  
GAQTQTEEMet TRYVQELQKHQETA EKTKRVSTKEI

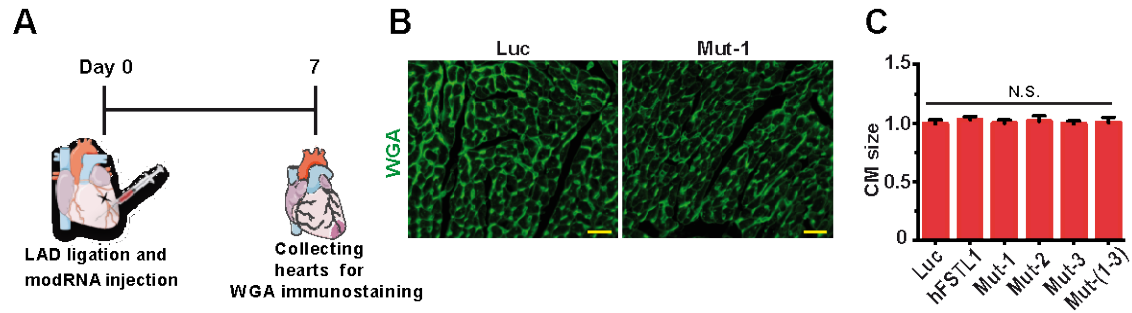

**Figure S2. Neither hFSTL1 or N-glycosylation-deficient hFSTL1 modRNAs cause CM hypertrophy in a mouse model of MI.** **A.** Experimental timeline for evaluation of the effects of the different hFSTL1 modRNAs with mutations affecting the various N-glycosylation sites on CM size *in vivo* seven days post MI. **B.** Representative images of wheatgerm agglutinin (WGA) staining to evaluate CM size 28 days after LAD ligation and treatment with hFSTL1 modRNAs with mutations of the different N-glycosylation sites. **C.** Quantification of the experiment described in B. Representative results of two independent experiments are shown; N.S. not significant,  $n=5$ , one-way ANOVA with Bonferroni correction for multiple testing, scale bar = 50 μm.

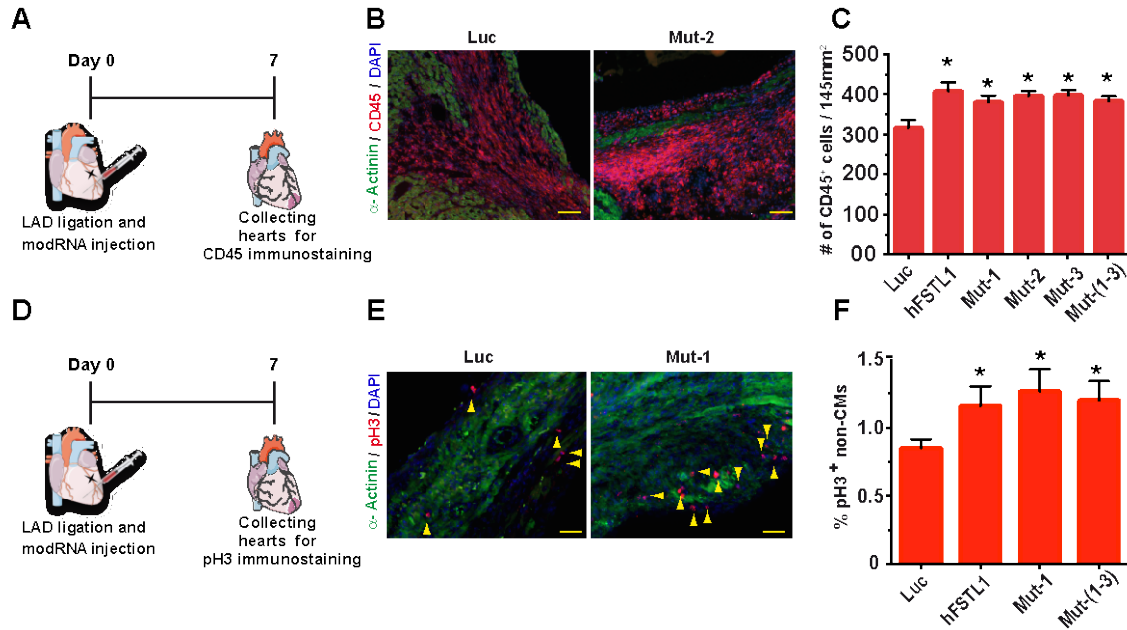

**Figure S3. hFSTL1 or N-glycosylation-deficient hFSTL1 enhances the immune response in a mouse model of MI.** **A.** Experimental timeline for evaluation of the effect of the different mutant hFSTL1 modRNAs on CD45<sup>+</sup> cell (leukocyte) infiltration into the left ventricle *in vivo*, seven days post MI. **B.** Representative images of CD45<sup>+</sup> cell infiltration into the left ventricle seven days post MI and treatment with Luc (modRNA control) or Mut-2 modRNAs. **C.** Quantification of the experiment described in A. **D.** Experimental timeline for evaluation of the effect of the different mutant hFSTL1 modRNAs on the PH3 proliferation marker in non-CMs in the left ventricle seven days post MI. **E.** Representative images of PH3<sup>+</sup> non-CMs cells in the left ventricle seven days post MI and treatment with Luc (modRNA control) or Mut-1 modRNAs. **F.** Quantification of the experiment described in D. Representative results from two independent experiments are shown. \*,  $P < 0.05$ .  $n = 7$ . One-way ANOVA with Bonferroni correction for multiple testing, scale bar = 50  $\mu\text{m}$ .

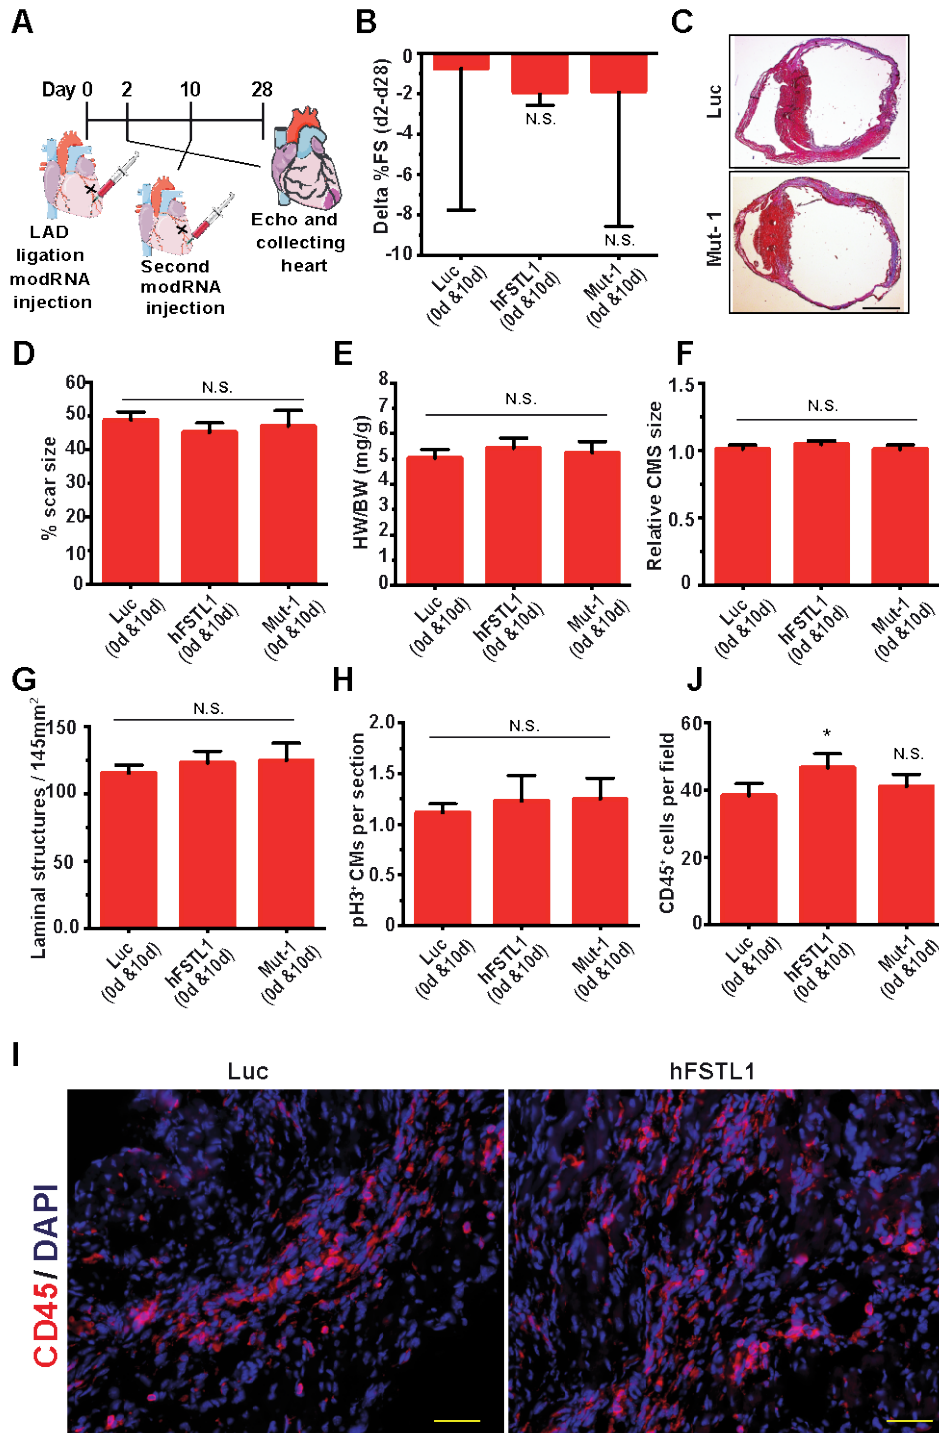

**Figure S4. Double hFSTL1 Mut-1 (N180Q) modRNA administration, immediately and 10 days post MI, does not improve cardiac function and outcome post MI**

**A.** Experimental timeline for the evaluation of cardiac function after the delivery on days 0 and 10 post MI of Luc (modRNA control), hFSTL1 or mutated hFSTL1 (at a single N-glycosylation site: N180Q, Mut-1) modRNAs. **B.** Echo evaluation of the change in % fractional shortening between day 2 (baseline) and day 28 post-MI. **C.** Representative

Masson trichrome staining to evaluate scar size 28 days post-MI. **D-I**. Quantification of scar size (**D**), heart weight-to-body weight ratio (**E**), CM size (**F**), and capillary density (**G**) PH3 expression in CMs (**H**), representative image of CD45 cells in the left ventricle after treatment with Luc or hFSTL1 modRNAs(**I**) and quantification of CD45 cells in the left ventricle 28 days post treatment. Representative results for two independent experiments are shown; \*,  $P < 0.05$ , N.S., not significant.  $n = 4$ . One-way ANOVA with Bonferroni correction for multiple testing, Scale bar = 1 mm (C) and 50  $\mu\text{m}$  (I).

## 2. Supplemental Tables

**Table S1: Antibodies used in this study**

| Antigen           | Dilution | Company                  | Catalog number |
|-------------------|----------|--------------------------|----------------|
| FSTL1             | 1:100    | R&D Systems              | AF1694         |
| BrdU              | 1:200    | Abcam                    | ab6326         |
| Aurora B          | 1:200    | BD Transduction          | 611082         |
| $\alpha$ -Actinin | 1:100    | Abcam                    | ab9465         |
| Ki-67             | 1:100    | Abcam                    | ab16667        |
| PH3               | 1:100    | Millipore                | 06-570         |
| Troponin I        | 1:50     | Santa Cruz Biotechnology | SC-15368       |
| CD45              | 1:100    | BD Pharmingen            | 550539         |
| CD31              | 1:100    | R&D Biosystems           | AF3628         |
| WGA               | 1:50     | Life Technologies        | W11261         |
